# Supplementary material for: Particulate suspension coating of capillary tubes
Source: Royal Society of Chemistry journal article supplement (doi:10.1039/d2sm01211a), 2022-01-01
Supplement: d2sm01211a5.pdf [file d2sm01211a5.pdf]

# Supporting Material for Particulate suspension coating of capillary tubes

D.-H. Jeong, L. Xing, J.-B. Boutin, and Alban Sauret

*Department of Mechanical Engineering, University of California, Santa Barbara, California 93106, USA*

September 29, 2022

## MOVIES OF THE EXPERIMENTS

- Movie corresponding to Figure 3(a): "Figure\_3a\_film\_250um\_film\_X2.avi" ..
- Movie corresponding to Figure 3(b): "Figure\_3b\_80um\_X2".
- Movie corresponding to Figure 4(a): "Figure\_4a\_20um".
- Movie corresponding to Figure 4(b): "Figure\_4b\_80um".
